## Seeding of outbreaks of COVID-19 by contaminated fresh and frozen food

Dale Fisher  
Alan Reilly  
Adrian Kang Eng Zheng  
Alex Cook  
Danielle Anderson

The authors have withdrawn this manuscript because some aspects of the published work were completed prior to regulatory approval. Therefore, the authors do not wish this work to be cited as reference for the project. If you have any questions, please contact the corresponding author.
